# Supplementary material for: Prognostic value of HER-2/neu expression in epithelial ovarian cancer: a systematic review and meta-analysis
Source: PubMed Central journal article supplement (PMC5650443; doi:10.18632/oncotarget.20657), 2017-09-06
Supplement: oncotarget-08-75528-s001.pdf [file oncotarget-08-75528-s001.pdf]

# Prognostic value of HER-2/neu expression in epithelial ovarian cancer: a systematic review and meta-analysis

## SUPPLEMENTARY MATERIALS

### APPENDIX

#### Search Strategy

Search included: PubMed, Embase, and the Cochrane Library Central Register of Controlled Trials, till March, 2016.

#### Supplementary Appendix 1: Search strategy for Pubmed (Publication date to 2016/03/17) result 769

---

1. "Ovarian Neoplasms" [Mesh]
  2. ((Ovarian[Title/Abstract]) OR Ovary[Title/Abstract]) OR ovaries[Title/Abstract]
  3. (((((cancer\*[Title/Abstract]) OR tumor[Title/Abstract]) OR tumour[Title/Abstract]) OR carcinoma[Title/Abstract]) OR neoplas\*[Title/Abstract]) OR malignan\*[Title/Abstract])
  4. 2 AND 3
  5. 1 OR 4
  6. "Genes, erbB-2"[Mesh]
  7. ((((((c-erbB-2[Title/Abstract]) OR c-erbB2[Title/Abstract]) OR Neu[Title/Abstract]) OR HER2[Title/Abstract]) OR HER-2/neu[Title/Abstract]) OR HER-2[Title/Abstract]) OR human epidermal growth factor receptor 2[Title/Abstract]
  8. 6 OR 7
  9. "Mortality"[Mesh]
  10. "Survival"[Mesh]
  11. "Prognosis"[Mesh]
  12. ((((((prognos\*[Title/Abstract]) OR survival[Title/Abstract]) OR recurren\*[Title/Abstract]) OR mortality[Title/Abstract]) OR predict\*[Title/Abstract]) OR outcome\*[Title/Abstract]) OR death[Title/Abstract])
  13. 9OR 10 OR 11 OR 12
  14. 5 AND8AND 13
- 

[(ovaries or ovary or ovarian) and (cancer\* or malignan\* or tumour or carcinoma or neoplas\* or tumor)]  
 (cerbB2 or Neu or HER2 or "human epidermal growth factor receptor 2")  
 (prognos\* or recurren\* or death or predict\* or survival).

**Supplementary Appendix 1: Search strategy for Embase (Publication date to 2016/03/22) result 1358**

---

15. 'ovary cancer'/exp
  16. ((ovaries or ovary or ovarian) and (cancer\* or malignan\* or tumour or carcinoma or neoplas\* or tumor)):ab,ti
  17. 1 OR 2
  18. 'epidermal growth factor receptor 2'/exp
  19. (cerbB2 OR Neu OR HER2 OR 'human epidermal growth factor receptor 2'):ab,ti
  20. 4 OR 5
  21. 'mortality'/exp
  22. 'survival'/exp
  23. 'prognosis'/exp
  24. (prognos\* OR recurren\* OR death OR predict\* OR survival):ab,ti
  25. 7 OR 8 OR 9 OR 10
  26. 3 AND 6 AND 11
-

**Supplementary Table 1: Meta-analysis of HER-2/neu expression and patient survival outcomes; analyses of the publication bias with different models for the overall survival and progression-free survival**

| <b>Variable</b>           | <b>No of studies</b>         | <b>HR(95% CI)</b>             | <b>P</b>             |
|---------------------------|------------------------------|-------------------------------|----------------------|
| Overall survival          | 51                           | 1.55 (1.40 to 1.72)           | <0.001               |
| Progression-free survival | 23                           | 1.20 (0.98 to 1.46)           | <0.001               |
| <b>Publication bias</b>   | <b>Begg's <i>P</i> value</b> | <b>Egger's <i>P</i> value</b> | <b>T&amp;F(Fill)</b> |
| Overall survival          | 0.808                        | 0.018                         | 1.31 ( 1.17–1.46)    |
| Progression-free survival | 0.402                        | 0.037                         | 1.29 (1.08–1.53)     |

**Abbreviations:** CI, confidence interval; Fill, number of studies added by trim-and-fill method; het, heterogeneity; HR, hazard ratio; T&F, result of trim-and-fill analysis, using assumption of random effects.
